# Supplementary material for: Thromboembolic Risk, Bleeding Outcomes and Effect of Different Antithrombotic Strategies in Very Elderly Patients With Atrial Fibrillation: A Sub‐Analysis From the PREFER in AF (PREvention oF Thromboembolic Events–European Registry in Atrial Fibrillation)
Source: PubMed Central journal article supplement — J Am Heart Assoc. 2017 Jul 23;6(7):e005657. doi: 10.1161/JAHA.117.005657 (PMC5586290; doi:10.1161/jaha.117.005657), 2017-07-23

# **SUPPLEMENTAL MATERIAL**

**Table S1.** Distribution of demographic and clinical characteristics according to age groups in patients included vs those excluded from the study.

| Variable                                     | Patients included        | Patients excluded*     | P value |
|----------------------------------------------|--------------------------|------------------------|---------|
|                                              | Age <85 years<br>N=5,907 | Age <85 years<br>N=749 |         |
| Female sex                                   | 2,260 (38.3)             | 301 (40.2)             | 0.2941  |
| BMI >30 kg/m <sup>2</sup>                    | 1,690 (29.6)             | 197 (28.3)             | 0.4781  |
| Systemic hypertension                        | 4,267 (72.6)             | 531 (71.8)             | 0.6211  |
| Congestive heart failure                     | 1,543 (28.2)             | 140 (23.0)             | 0.0072  |
| Prior TIA/stroke/ thromboembolism            | 857 (14.7)               | 75 (10.2)              | 0.0009  |
| Vascular disease                             | 1,204 (22.0)             | 146 (24.1)             | 0.2442  |
| Chronic renal failure                        | 722 (12.5)               | 69 (9.5)               | 0.0190  |
| Left atrial dilatation (diameter >40 mm)     | 3,443 (70.3)             | 441 (65.0)             | 0.0043  |
| Chronic obstructive pulmonary disease        | 653 (11.2)               | 81 (11.0)              | 0.8622  |
| Antithrombotic therapies                     |                          |                        |         |
| No therapy                                   | 349 (5.9)                | 62 (8.3)               | 0.0111  |
| Oral anticoagulant                           | 4,917 (83.2)             | 608 (81.2)             | 0.1562  |
| VKA                                          | 4556 (77.3)              | 555 (74.1)             | 0.0643  |
| NOAC                                         | 361 (6.1)                | 53 (7.1)               | 0.3031  |
| Antiplatelet only                            | 641 (10.9)               | 79 (10.6)              | 0.8007  |
| Oral anticoagulant plus antiplatelet         | 662 (11.2)               | 73 (9.8)               | 0.2295  |
| CHA <sub>2</sub> DS <sub>2</sub> -VASc score | 3.30±1.73                | 3.17±1.78              | 0.1156  |
| Variable                                     | Patients included        | Patients excluded*     | P Value |
|                                              | Age ≥85 years<br>N=505   | Age ≥85 years<br>N=64  |         |
| Female sex                                   | 286 (56.6)               | 39 (60.9)              | 0.5122  |
| BMI >30 kg/m <sup>2</sup>                    | 59 (12.2)                | 8 (13.6)               | 0.7672  |
| Systemic hypertension                        | 391 (78.5)               | 50 (79.4)              | 0.8767  |
| Congestive heart failure                     | 210 (44.7)               | 22 (42.3)              | 0.7438  |
| Prior TIA/stroke/ thromboembolism            | 104 (20.9)               | 7 (11.1)               | 0.0666  |
| Vascular disease                             | 138 (29.5)               | 14 (26.9)              | 0.6997  |
| Chronic renal failure                        | 120 (24.3)               | 15 (24.2)              | 0.9865  |
| Left atrial dilatation (diameter >40 mm)     | 316 (77.3)               | 33 (64.7)              | 0.0482  |
| Chronic obstructive pulmonary disease        | 74 (14.8)                | 7 (11.1)               | 0.4284  |
| Antithrombotic therapies                     |                          |                        |         |
| No therapy                                   | 35 (6.9)                 | 3 (4.7)                | 0.4983  |
| Oral anticoagulant                           | 393 (77.8)               | 49 (76.6)              | 0.8197  |
| VKA                                          | 362 (71.7)               | 47 (73.4)              | 0.7687  |
| NOAC                                         | 31 (6.1)                 | 2 (3.1)                | 0.3312  |
| Antiplatelet only                            | 77 (15.3)                | 12 (18.8)              | 0.4674  |
| Oral anticoagulant plus antiplatelet         | 50 (9.9)                 | 4 (6.3)                | 0.3478  |
| CHA <sub>2</sub> DS <sub>2</sub> -VASc score | 4.72±1.42                | 4.56±1.16              | 0.6112  |

Values are given as n. (%).

BMI= Body mass index; NOAC=Non-vitamin K antagonist oral anticoagulant; TIA=Transient ischemic attack; VKA=Vitamin K antagonist.

\* Out of the 816 excluded patients, 3 patients are not reported in the Table because age was missing.

**Figure S1.** Net clinical benefit, adjusted for the mortality risk, of OAC vs no OAC (antiplatelet therapy only or no antithrombotic drug) according to different age strata, including ischemic stroke, systemic embolism, hemorrhagic stroke and major bleeding (without myocardial infarction) as outcome measures. OAC=Oral anticoagulant therapy.

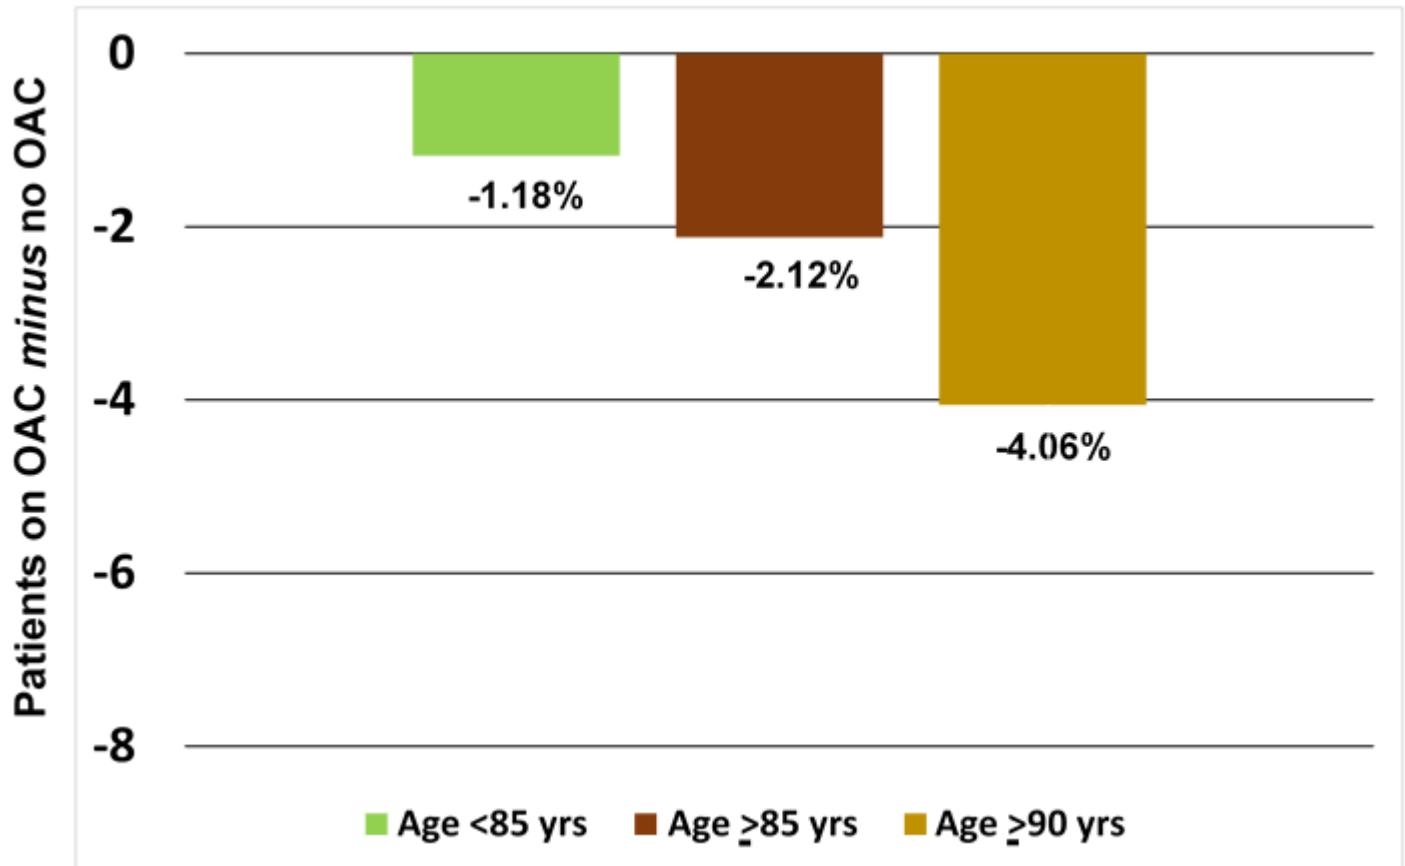

Supplement: JAH3-6-e005657-s001.pdf [file JAH3-6-e005657-s001.pdf]
